# Supplementary material
Source: Springer Nature journal article supplement (https://www.springermedizin.de/resource/supplementary/12936_2009_1155_MOESM2_ESM.pdf/9549988)
Supplement: MOESM2 [file 9549988]

| D0 | D1 | D3 | D7 | D14 | Outcome | Frequency |    |
|----|----|----|----|-----|---------|-----------|----|
|    |    |    |    |     | ACPR    | 1         | 72 |
|    |    |    |    |     | ACPR    | 1         |    |
|    |    |    |    |     | ACPR    | 3         |    |
|    |    |    |    |     | ACPR    | 1         |    |
|    |    |    |    |     | LCF     | 1         |    |
|    |    |    |    |     | LCF     | 2         |    |
|    |    |    |    |     | LPF     | 4         |    |
|    |    |    |    |     | LPF     | 3         |    |
|    |    |    |    |     | LPF     | 1         |    |
|    |    |    |    |     | LPF     | 1         |    |
|    |    |    |    |     | ETF     | 3         |    |
|    |    |    |    |     | ETF     | 29        |    |
|    |    |    |    |     | ETF     | 1         |    |
|    |    |    |    |     | ETF     | 12        |    |
|    |    |    |    |     | ETF     | 6         |    |
|    |    |    |    |     | ETF     | 2         |    |
|    |    |    |    |     | WTH     | 1         |    |
|    |    |    |    |     | ACPR    | 1         | 19 |
|    |    |    |    |     | ACPR    | 2         |    |
|    |    |    |    |     | LPF     | 2         |    |
|    |    |    |    |     | LPF     | 1         |    |
|    |    |    |    |     | LPF     | 1         |    |
|    |    |    |    |     | LCF     | 1         |    |
|    |    |    |    |     | LCF     | 2         |    |
|    |    |    |    |     | ETF     | 2         |    |
|    |    |    |    |     | ETF     | 1         |    |
|    |    |    |    |     | ETF     | 3         |    |
|    |    |    |    |     | ETF     | 1         |    |
|    |    |    |    |     | WTH     | 1         |    |
|    |    |    |    |     | WTH     | 1         |    |

 PCR negative (no DNA amplified)

 CVIET

 CVMNK

 Not done due to treatment failure/withdrawal/missing sample
